# Supplementary material for: Mesoporous microspheres of nickel-based layered hydroxides by aerosol-assisted self-assembly using crystalline nano-building blocks
Source: Springer Nature journal article supplement (doi:10.1007/s10971-018-4810-z), 2018-09-15
Supplement: MOESM1 [file 16127686]

**Supplementary Information**

**Mesoporous Microspheres of Nickel-based Layered Hydroxides by Aerosol-Assisted Self-Assembly using Crystalline Nano-Building Blocks.**

*Naoki Tarutani†, Yasuaki Tokudome†*, Matías Jobbágy§, Galo J. A. A. Soler-Illia#, Masahide Takahashi†.*

*†Department of Materials Science, Graduate School of Engineering, Osaka Prefecture University, Sakai, Osaka 599-8531, Japan*

*§INQUIMAE-CONICET, Facultad Ciencias Exactas y Naturales, Universidad de Buenos Aires, Buenos Aires, C1428GA, Argentina*

*#* *Instituto de Nanosistemas, Universidad Nacional de General San Martín-CONICET, Av. 25 de Mayo y Francia, San Martín, 1650, Argentina.*

Figure S1 3

Figure S2 4

Table S1 5

**Characterization.**

**Calculation of NBB diameter using small angle X-ray scattering measurement.**

The small angle X-ray scattering (SAXS) measurement was performed to characterize formed particle size and mesostructures with the beamline of the Brazilian Synchrotron Light Laboratory (LNLS, Brazil D11A-SAXS1-18927 and 20160366). X-ray with a wavelength, **, of 0.1544 nm was used. A linear position sensitive X-ray detector and a multichannel analyzer were used to collect the SAXS signal. For in-situ analysis, SAXS patterns were collected every 1 min (45 s for accumulation time and 15 s for dead time). The first pattern was collected reaction time from 1.5 to 2.5 min, which is denoted as pattern of 2 min reacted solution. A sample-to-detector distance was set at 904.6242 mm, corresponding scattering vector range of 0.1−4.8 nm−1. After the removal of background, the scattering profiles were circular averaged and plotted against the scattering vector, *q*, according to the following equation;

where ** is scattering angle. To evaluate particle size from experimental SAXS patterns, we employed a unified equation proposed by Beaucage and Schaefer [Beaucage, G.; Schaefer, D.W. *J. Non-Cryst. Solids* **1994**, *172-174*, 797-805.; Beaucage, G. *J. Appl. Cryst.* **1995**, *28*, 717-728.], which was developed to describe scattering from objects with hierarchical structures. The unified equation for the hierarchical structure with multiple structural levels is described as follows;

where *n* is the number of structure levels, *Rgi* is the gyration radius of the *i*th level, *Pi* is the power-law exponent, *Gi* is the Guinier prefactor, and *Bi* is the prefactor specific to the type of power-law scattering falls. The parameter *n* = 1 was employed for analysis. The particle diameter of *i*th level, *Di*, is calculated by using spherical particle model as follows;

**Calculation of relative Ni ion amount in reacting solution.**

The relative Ni2+ amount was estimated from the calibration curve, log(**) = 0.7607 × log(*C*Ni) + 3.707, where ** and *C*Ni are the conductivity of the solution and the concentration of Ni2+, respectively. The calibration curve was obtained with an ethanol solvent at different *C*Ni values (10−3, 10−2, 10−1, 100 mol/L). The conductivities of ethanol (1.14 μS/cm), glutaric acid (1.36 μS/cm at 0.5 mol/L in ethanol) and acrylic acid (1.76 μS/cm at 0.5 mol/L in ethanol) are small enough compared to that of NiCl2∙6H2O (3490 μS/cm at 0.5 mol/L in ethanol), confirming that the change of ** is proportionally correlated to the change of *C*Ni in the measured concentration range.


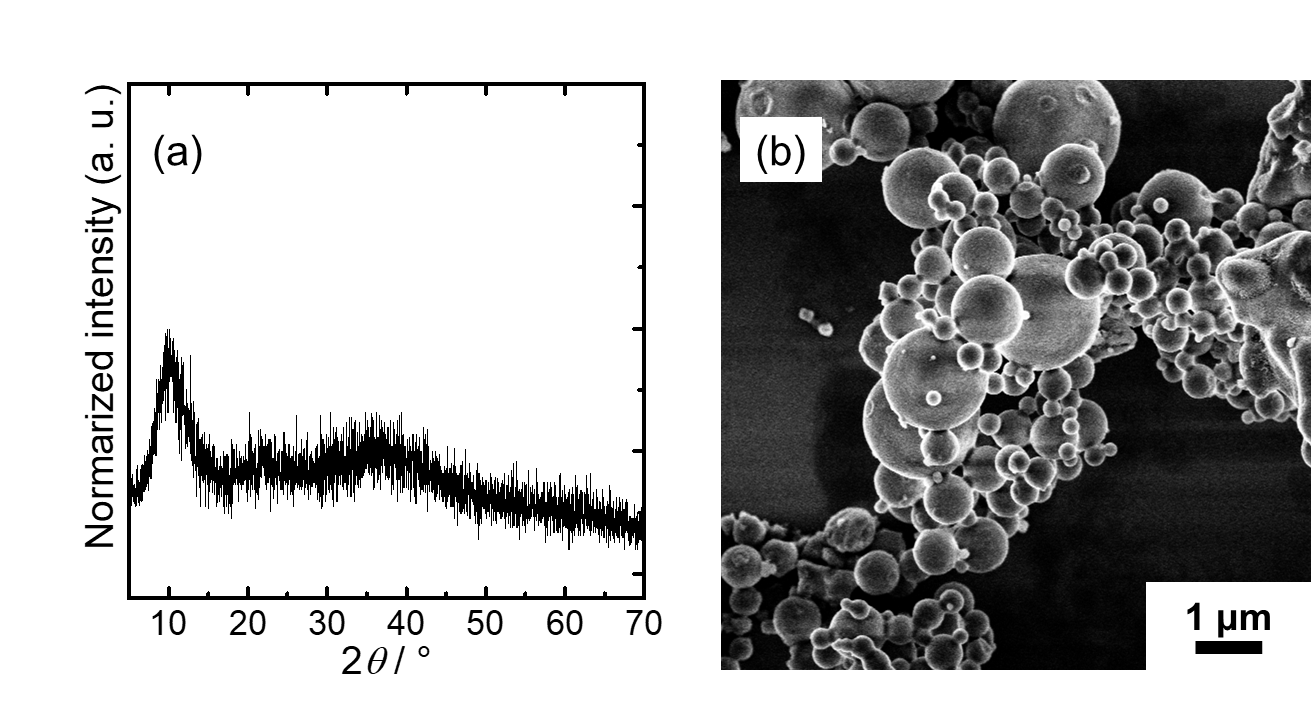


**Figure S1.** (a) PXRD pattern and (b) SEM image of heat-treated MMS prepared with *t* = 5 min and F127/Ni = 0.005.


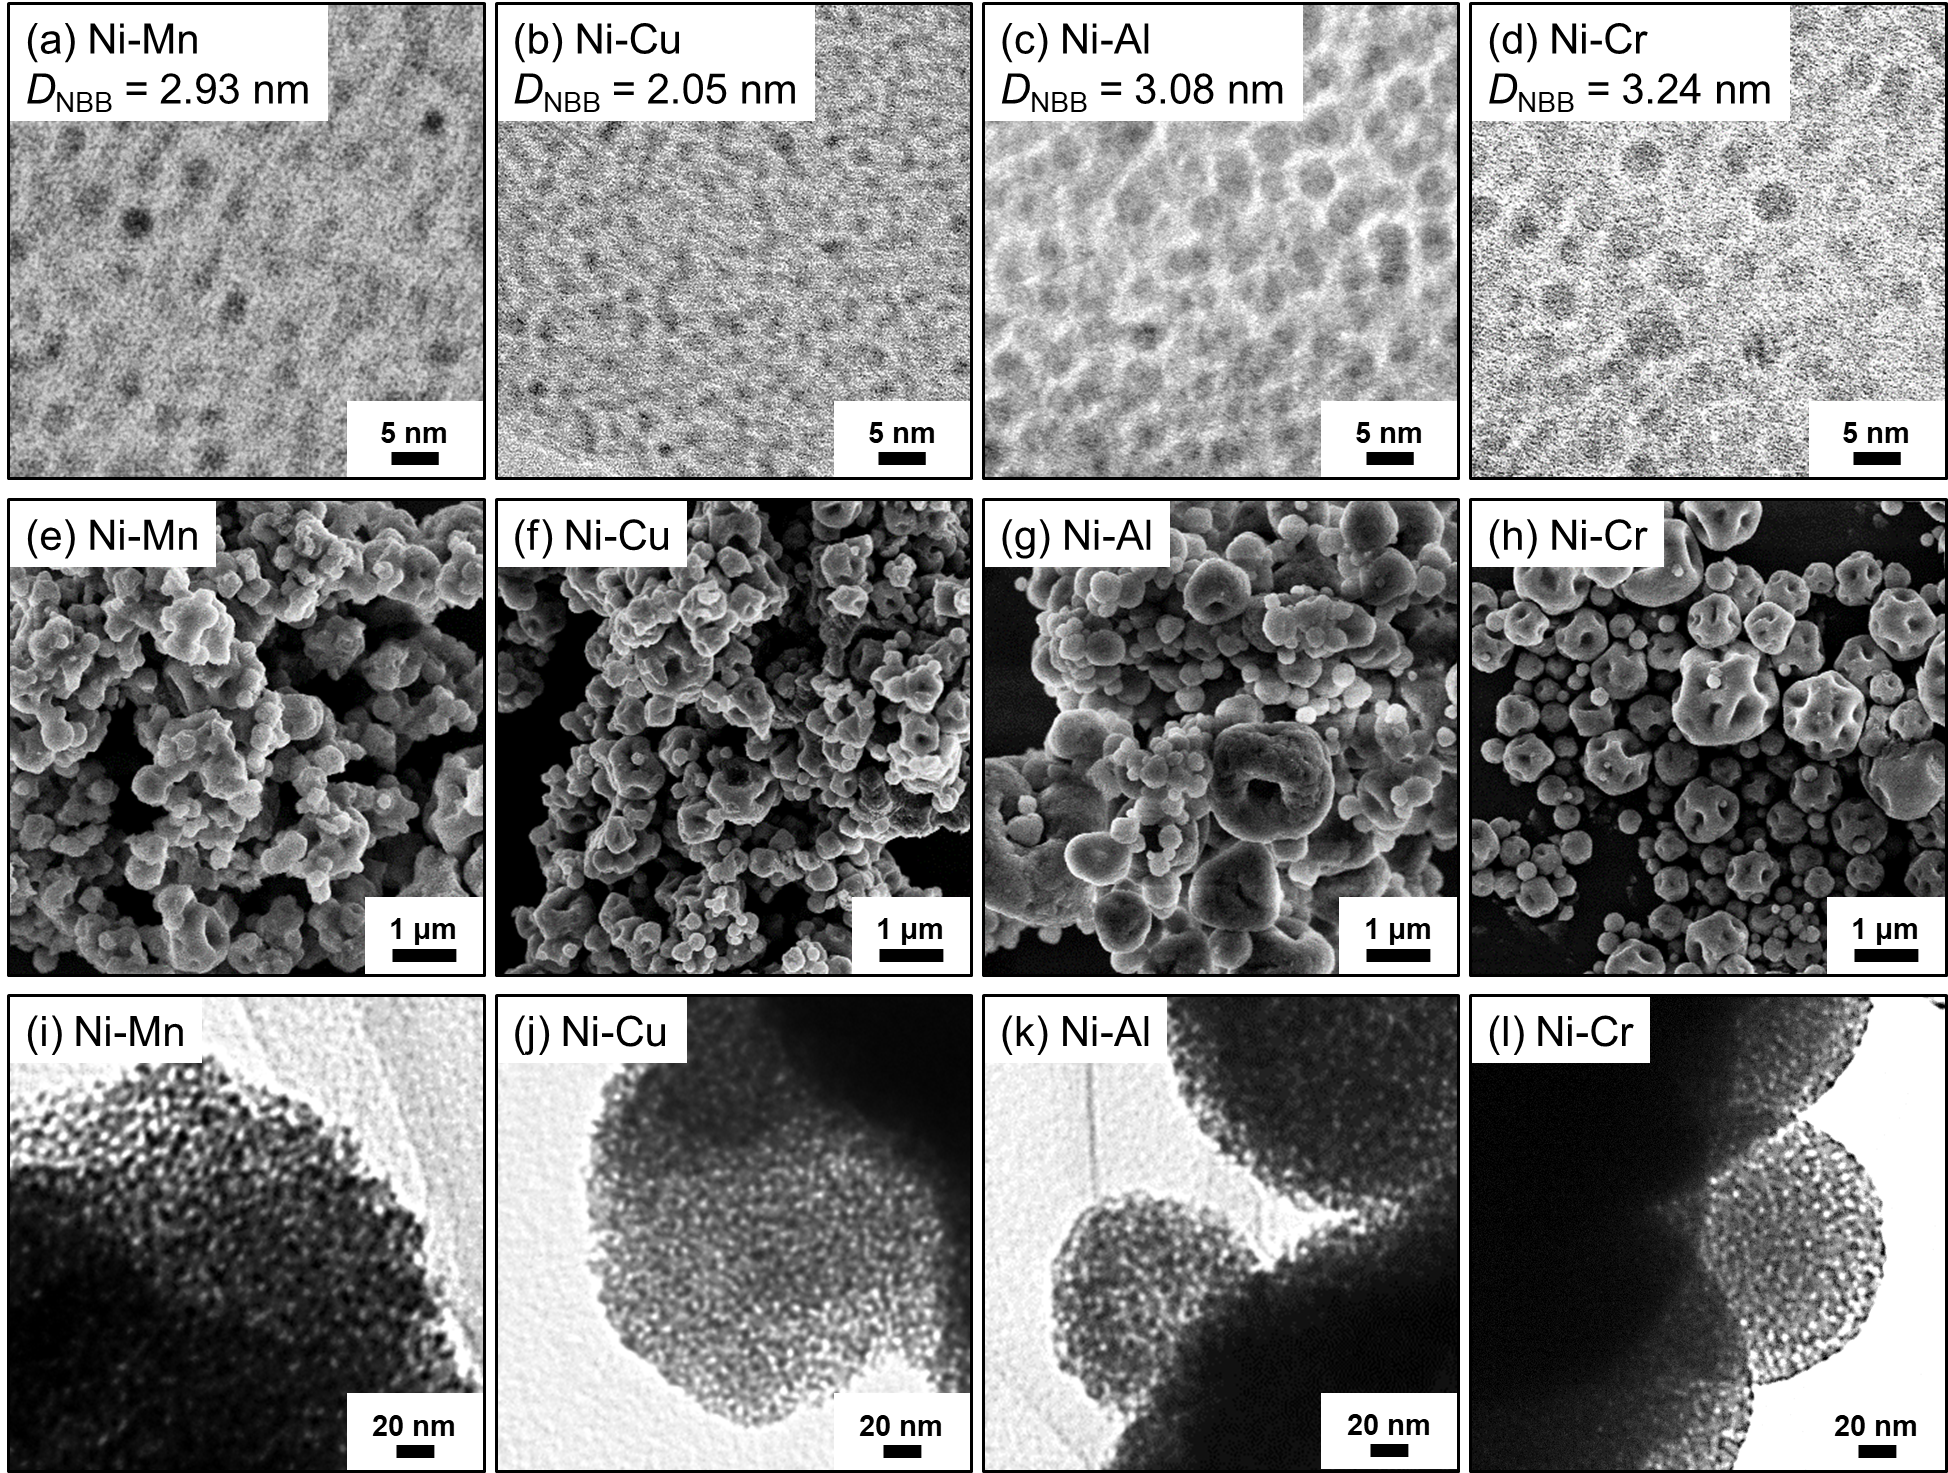


**Figure S2.** (a)−(d) STEM images of NBB before spray-drying and (e)−(h) SEM and (i)−(l) TEM images of heat-treated MMSs prepared with different chemical compositions; Ni-M, M = Mn(II), Cu(II), Al, and Cr(III). The diameters of 100 particles were averaged to estimate *D*NBB.

**Table S1.** The chemical composition and dimeter of NBBs prepared from the solution containing different metal salts.

| Sample ID | Nominal molar ratio  Ni : M | Molar ratio of NBB Ni : M | *D*NBB / nm |
| --- | --- | --- | --- |
| Ni(OH)2 | N/A | N/A | 2.00 |
| Ni-Mn | 0.75 : 0.25 | 0.80 : 0.20 | 2.93 |
| Ni-Co | 0.75 : 0.25 | 0.71 : 0.29 | 2.56 |
| Ni-Cu | 0.75 : 0.25 | N/A*a* | 2.05 |
| Ni-Al | 0.75 : 0.25 | 0.80 : 0.20 | 3.08 |
| Ni-Fe | 0.75 : 0.25 | 0.82 : 0.18 | 2.90 |
| Ni-Cr | 0.75 : 0.25 | 0.79 : 0.21 | 3.24 |

*a*: The chemical composition was not obtained from EDS measurement because the signal of Cu from TEM grid was included.
